# Supplementary material for: Identification of Novel Fusion Genes in Pediatric B-ALL patients Using Whole Transcriptome Sequencing
Source: Research Square preprint supplement (doi:10.21203/rs.3.rs-7808597/v1), 2025-10-24
Supplement: Supplementary file 1 [file d4011863879d29994cacdc93.docx]

**Table 1: Fusion Transcripts found in the B Acute Lymphoblastic Leukemic Patients of the current study**

| **Patient ID** | **Gene 1** | **Gene** | **Site1** | **Site2** | **Type** | **Gene-ID1** | **Gene-ID2** | **Transcript-ID1** | **Transcript-ID2** | **Reference** |
| --- | --- | --- | --- | --- | --- | --- | --- | --- | --- | --- |
| **ALL-01** | BCR | ABL1 | intron | intron | translocation | ENSG00000186716 | ENSG00000097007 | NA | NA | Reported in ALL |
| **ALL-02** | BCAR1 | BCAR1 | CDS | intron | inversion/5'-5' | ENSG00000050820 | ENSG00000050820 | ENST00000393422 | NA | Unreported in ALL |
| **ALL-03** | ETV6 | RUNX1 | intron | intron | translocation | ENSG00000139083.9 | ENSG00000159216.17 |  |  | Reported in ALL |
| NPR1 | GALNT8 | CDS | intron | translocation | ENSG00000169418.9 | ENSG00000130035.5 | ENST00000368680.3 |  | Unreported in ALL |
| **All-06** | STIM1 | CSNK2A1 | CDS/splice-site | 5'UTR/splice-site | translocation | ENSG00000167323.8 | ENSG00000101266.15 | ENST00000300737.7 | ENST00000400227.6 | Unreported Partner gene (STIM1) |
| PRKCB | COTL1 | CDS/splice-site | CDS/splice-site | inversion | ENSG00000166501.11 | ENSG00000103187.7 | ENST00000321728.10 | ENST00000262428.4 | Unreported in ALL |
| MEX3C | ZBTB16 | CDS/splice-site | 5'UTR/splice-site | translocation | ENSG00000176624.10 | ENSG00000109906.12 | ENST00000406189.3 | ENST00000335953.7 | Fusion Unreported in ALL |
| MAD1L1 | CUX1 | CDS/splice-site | CDS/splice-site | inversion | ENSG00000002822.14 | ENSG00000257923.8 | ENST00000406869.4 | ENST00000437600.7 | Unreported in ALL |
| **ALL-07** | TAF3 | TAF3 | CDS | CDS | duplication/ITD | ENSG00000165632.7 | ENSG00000165632.7 | ENST00000344293.5 | ENST00000344293.5 | Reported in ALL |
| PTMS | MICAL3 | CDS/splice-site | intron | translocation/5'-5' | ENSG00000159335.14 | ENSG00000243156.6 | ENST00000619580.3 | . | Unreported in ALL |
| **ALL-08** | TCF3 | PBX1 | CDS/splice-site | CDS/splice-site | translocation | ENSG00000071564 | ENSG00000185630 | ENST00000262965 | ENST00000420696 | Reported in ALL |
| **ALL-10** | PCBP1 | ARPC3 | CDS | CDS | translocation | ENSG00000169564.6 | ENSG00000111229.14 | ENST00000303577.6 | ENST00000228825.10 | Unreported in ALL |
| SNX2 | ABL1 | CDS/splice-site | CDS/splice-site | translocation | ENSG00000205302.5 | ENSG00000097007.16 | ENST00000379516.5 | ENST00000372348.5 | Unreported Partner gene (SNX2) |
| ABL1 | SNX2 | CDS/splice-site | CDS/splice-site | translocation | ENSG00000097007.16 | ENSG00000205302.5 | ENST00000372348.5 | ENST00000379516.5 | Unreported Partner gene (SNX2) |
| **ALL-11** | C2CD5 | CDKN2C | CDS | intron | translocation/5'-5' | ENSG00000111731 | ENSG00000123080 | ENST00000333957 | . | Unreported in ALL |
| PAX5 | ETV6 | intron | intron | translocation | ENSG00000196092.11 | ENSG00000139083.9 | . | . | Unreported rearrangement |
| IKZF2 | TACC1 | exon | intron | translocation | ENSG00000030419.15 | ENSG00000147526.18 | ENST00000484040.1 | . | Unreported Partner gene (TACC1) |
| **ALL-12** | CMC2 | ATXN3 | 5'UTR/splice-site | CDS/splice-site | translocation | ENSG00000286221 | ENSG00000066427 | ENST00000651611 | ENST00000647161 | Unreported Partner gene (CMC2) |
| REEP5 | UBB | CDS/splice-site | 5'UTR/splice-site | translocation | ENSG00000129625.11 | ENSG00000170315.12 | ENST00000379638.7 | ENST00000302182.6 | Unreported in ALL |
|  |  |  |  |  |  |  |  |  |  |  |
